# Supplementary material for: Mobile Apps for Bipolar Disorder: A Systematic Review of Features and Content Quality
Source: PubMed Central journal article supplement (PMC4642376; doi:10.2196/jmir.4581), 2015-08-17
Supplement: jmir_v17i8e198_app1.pdf [file jmir_v17i8e198_app1.pdf]

Multimedia Appendix 1: List of apps included in the review.

| App ID | Title                         | Developer                        | Function                 | Price  | Version |
|--------|-------------------------------|----------------------------------|--------------------------|--------|---------|
| 1      | Recovery International        | Brian Corson                     | Information              | \$0.00 |         |
| 6      | eMoods Bipolar Mood Tracker   | Yottaram LLC                     | Symptom monitoring       | \$0.00 | 130110  |
| 7      | Bipolar Treatment             | Karl Evans                       | Information              | \$0.00 | 14      |
| 8      | Bipolar Test                  | Consurgo                         | Screening and assessment | \$0.00 | 1.5     |
| 9      | Bipolar Tracker               | William Alexander                | Screening and assessment | \$0.00 |         |
| 10     | Bipolar Connect               | Alliance Health Network          | Community support        | \$0.00 |         |
| 11     | Bipolar                       | Kindle Trove Apps                | Information              | \$0.00 | 4.0     |
| 12     | Mood Chart Bipolar Depression | Monitor My Health, LLC           | Symptom monitoring       | \$0.00 | 1.01    |
| 14     | Bipolar Disorder Treatment    | InfoApps24                       | Information              | \$0.00 |         |
| 15     | Bipolar Disorder Uncovered    | KoolAppz                         | Information              | \$1.29 | 1.0     |
| 18     | Bipolar Disorder              | Deep Powder Software             | Information              | \$3.00 | 1.0     |
| 19     | Bipolar Uncovered             | My Mean Apps                     | Information              | \$0.99 | 1.02    |
| 20     | Bipolar Explained             | KoolAppz                         | Information              | \$4.69 | 1.0     |
| 21     | Living with Bipolar Disorder  | KoolAppz                         | Information              | \$1.29 | 1.0     |
| 23     | Bipolar Disorder Symptoms     | WE HELP YOU                      | Information              | \$0.00 |         |
| 24     | Bipolar Disorder Help         | Appnok.co                        | Information              | \$1.26 | 1.0     |
| 26     | BIPOLAR DISORDER UNCOVERED    | IDJ Group                        | Information              | \$0.00 |         |
| 28     | What Is Bipolar Disorder      | WE HELP YOU                      | Information              | \$0.00 |         |
| 31     | Psych Central                 | Liviant LLC                      | Information              | \$0.00 | 2.0     |
| 32     | Free Mood Tracker             | Invicta Trading and Promotion HB | Symptom monitoring       | \$0.00 | 1.3     |
| 39     | Your.MD's Symptom Checker     | Your.MD                          | Information              | \$0.00 |         |

|    |                                |                             |                             |         |      |
|----|--------------------------------|-----------------------------|-----------------------------|---------|------|
| 44 | Health Tips                    | JD Star                     | Information                 | \$0.00  | 2.2  |
| 49 | Personal Psychology Tests      | Darren Gates                | Screening and<br>assessment | \$0.99  | 1.0  |
| 50 | BipolarTracker Pro             | ToTheHand, LLC              | Symptom<br>monitoring       | \$1.92  |      |
| 56 | iMoodJournal                   | Inexika Inc                 | Symptom<br>monitoring       | \$0.99  | 1.3  |
| 58 | Personal Progress Tracker      | SoundMindz.Org              | Symptom<br>monitoring       | \$0.00  | 2.5  |
| 60 | Moodlytics, Smart Mood Tracker | AnantApps by Avinashi       | Symptom<br>monitoring       | \$0.00  |      |
| 62 | Moodtrack Diary: Mood Tracker  | Matthew Windwer             | Symptom<br>monitoring       | \$0.00  |      |
| 63 | 1-800-therapist                | 1-800-therapist             | Information                 | \$0.00  | 1.0  |
| 64 | Primary School Assessments     | Darren Gates                | Screening and<br>assessment | \$0.99  | 1.0  |
| 65 | Smiley Calendar                | 3 ACORN Technologies, LLC   | Symptom<br>monitoring       | \$0.00  | 1.7  |
| 69 | Bipol-App                      | Healthcare Learning Smile-o | Symptom<br>monitoring       | \$0.00  |      |
| 70 | In Flow - Mood Diary           | AITA LTD                    | Symptom<br>monitoring       | \$0.00  | 1.19 |
| 72 | Preschooler Assessments        | Darren Gates                | Screening and<br>assessment | \$0.99  | 1.0  |
| 75 | Health Guide                   | Juan Beltran & Juan Herna   | Information                 | \$0.00  | 2.0  |
| 76 | RxWiki                         | RxWiki, Inc                 | Information                 | \$0.00  |      |
| 78 | MHF                            | Together For Change         | Community<br>support        | \$0.00  |      |
| 80 | How Are You - Mood Tracker     | Quantum Lab Co.             | Symptom<br>monitoring       | \$13.82 | 1.61 |
| 81 | Yoga for you                   | Yashendu Goswami            | Information                 | \$0.00  | 1.1  |
| 82 | dailyRx                        | dailyRx, Inc                | Information                 | \$0.00  |      |

|     |                               |                             |                                        |         |      |
|-----|-------------------------------|-----------------------------|----------------------------------------|---------|------|
| 83  | WhatsMyM3                     | M3 Information              | Screening and<br>assessment<br>Symptom | \$0.00  | 1.9  |
| 87  | Personal Depression Journal   | Monitor My Health, LLC      | monitoring                             | \$2.22  | 1.1  |
| 90  | Depression 101 by WAGmob      | WAGmob (Simple 'n Easy)     | Information<br>Symptom                 | \$2.14  | 2.5  |
| 95  | Mood O Scope : Mood Tracker   | XLabz Technologies Pvt Ltd  | monitoring                             | \$0.00  | 2.02 |
| 97  | Mental Health Maintenance     | Dnvgoods                    | Information                            | \$0.00  | 1.0  |
| 105 | Family                        | mhapps development          | Information<br>Symptom                 | \$0.00  |      |
| 106 | MoodiModo BETA - Mood Tracker | The Abolitionist Project    | monitoring                             | \$0.00  | 1.53 |
| 109 | Mental Health Disorders       | Cool Help Guide             | Information<br>Symptom                 | \$0.00  |      |
| 114 | Mood Tracker By: CTHF         | Cheryl T. Herman Foundation | monitoring                             | \$0.00  | 1.1  |
| 122 | Mental Health At Work         | eMETA Learning Solution     | Information<br>Screening and           | \$0.00  | 2.0  |
| 129 | Your Child's Social Health    | Darren Gates                | assessment                             | \$0.99  | 1.0  |
| 138 | Control                       | mhapps development          | Information<br>Symptom                 | \$0.00  |      |
| 143 | Activity record table / free  | YabuSoft                    | monitoring                             | \$0.00  | 1.1  |
| 164 | Medical disease FAQ           | Honey Computing Service     | Information<br>Symptom                 | \$10.67 | 1.1  |
| 166 | Activity record table         | YabuSoft                    | monitoring<br>Symptom                  | \$1.70  | 1.0  |
| 167 | Daily Mood                    | Kaizen Dev                  | monitoring                             | \$0.00  | 1.3  |
| 168 | Mental Health Maintenance     | Bizzap                      | Information<br>Symptom                 | \$1.67  |      |
| 177 | Mood diary - depression       | Julia Bechmann              | monitoring<br>Symptom                  | \$2.96  | 1.1  |
| 179 | Mood diary - depression Lite  | Julia Bechmann              | monitoring<br>Symptom                  | \$0.00  | 1.1  |
| 328 | iMoodJournal -mood journal    | Inexika Inc.                | monitoring                             | \$2.49  | 1.54 |

|     |                                                       |                                 |                          |         |      |
|-----|-------------------------------------------------------|---------------------------------|--------------------------|---------|------|
| 329 | Bipolar Disorder Connect                              | Alliance Health Networks, Inc   | Community support        | \$0.00  | 3.4  |
| 330 | Optimism                                              | Optimism Apps Pty Ltd           | Symptom monitoring       | \$0.00  | 2.58 |
| 332 | Bipolar Disorder Uncovered                            | AppWarrior                      | Information              | \$1.29  | 1.0  |
| 333 | Moody Me - Mood Diary and Tracker                     | Medhelp                         | Symptom monitoring       | \$0.00  | 1.31 |
| 336 | Bipolar Bear                                          | Mark Braden                     | Awareness                | \$1.29  | 1.0  |
| 339 | How Are You - depression, bipolar and mood            | Quantum Lab Co.                 | Symptom monitoring       | \$16.99 | 2.83 |
| 345 | In Flow - Mood and Emotion Diary                      | AITA LIMITED                    | Symptom monitoring       | \$0.00  | 2.5  |
| 348 | Mood O Scope                                          | XLabz Technologies Pvt. Ltd.    | Symptom monitoring       | \$0.00  | 1.1  |
| 351 | MoodLog                                               | Markus Schopfer                 | Symptom monitoring       | \$0.00  | 1.0  |
| 353 | Bipol-App                                             | Healthcare Learning Company Ltd | Symptom monitoring       | \$0.00  |      |
| 356 | iMind & Mood                                          | Samuel Lundin                   | Screening and assessment | \$2.49  | 1.1  |
| 357 | Better Mood Tracker - A Quantified Self Research Tool | Alexander Stone                 | Symptom monitoring       | \$0.00  | 1.3  |
| 358 | iCouch CBT                                            | iCouch Inc.                     | Treatment                | \$4.99  | 2.0  |
| 375 | MHF                                                   | Neil Morris                     | Community support        | \$0.00  | 1.3  |
| 376 | Personal Mood Chart Journal                           | Monitor My Health, LLC          | Symptom monitoring       | \$3.79  | 1.1  |
| 378 | MentalChecker                                         | DuxSolutions                    | Screening and assessment | \$1.29  | 1.0  |
| 393 | WhatsMyM3                                             | M-3 Information, LLC            | Screening and assessment | \$1.29  | 1.7  |
| 403 | How was your mood                                     | DevJockeys                      | Symptom                  | \$1.29  | 1.1  |

|     |                                                          |                   |                           |        |      |
|-----|----------------------------------------------------------|-------------------|---------------------------|--------|------|
| 404 | iBipolar                                                 | Michael Mahon     | monitoring<br>Information | \$2.49 | 1.0  |
| 407 | BipolarTrack                                             | Gioel Asuni       | Symptom<br>monitoring     | \$2.49 | 3.0  |
| 409 | SleepNotes - Lifestyle administrator<br>in your pockets. | Masahiro Taniuchi | Symptom<br>monitoring     | \$2.49 | 1.08 |
| 417 | MoodWatcher                                              | Samuel Fremaux    | Symptom<br>monitoring     | \$1.29 | 1.1  |

---
